# Supplementary material for: Redox sensing by a Rex-family repressor is involved in the regulation of anaerobic gene expression in Staphylococcus aureus
Source: PubMed Central journal article supplement (PMC2883068; doi:10.1111/j.1365-2958.2010.07105.x), 2010-03-30
Supplement: mmi0076-1142-SD1.pdf [file mmi0076-1142-SD1.pdf]

Table S1. Genome-wide search of potential Rex binding sites in *S. aureus* COL

| Locus <sup>a</sup>                  | Symbol <sup>a</sup> | Description <sup>a</sup>                                     | Position <sup>b</sup> | Putative Rex binding sites <sup>c</sup>               | EMSA <sup>d</sup> | Expression under anaerobic conditions <sup>e</sup> |        |         |  |  |
|-------------------------------------|---------------------|--------------------------------------------------------------|-----------------------|-------------------------------------------------------|-------------------|----------------------------------------------------|--------|---------|--|--|
|                                     |                     |                                                              |                       |                                                       |                   | Gene                                               | Operon | Protein |  |  |
| <b>3 motives without mismatches</b> |                     |                                                              |                       |                                                       |                   |                                                    |        |         |  |  |
| SACOL0135                           | <i>(adhE)</i>       | alcohol dehydrogenase, iron-containing                       | -39                   | T T G T G A A   a t a a   T T C A C A A               | shift             | up                                                 | up     | up/down |  |  |
| SACOL0301                           | <i>(nirC)</i>       | formate/nitrite transporter family protein                   | -51                   | T T G T G A A   a t t a   T T C A C A A               | shift             | up                                                 | up     |         |  |  |
| SACOL1478                           | <i>ald1</i>         | alanine dehydrogenase                                        | -38                   | T T G T G A A   a t t a   T T C A C A A               | shift             | up                                                 | up     | up      |  |  |
| <b>6 motives with 1 mismatch</b>    |                     |                                                              |                       |                                                       |                   |                                                    |        |         |  |  |
| SACOL0166                           |                     | conserved hypothetical protein                               | -59                   | T T G T G A <u>↓</u> t a t t   T T C A C A A          |                   | up                                                 | up     |         |  |  |
| SACOL0660                           | <i>(adh1)</i>       | alcohol dehydrogenase, zinc-containing                       | -306                  | T T G T G A A   t t a a   T T C A C A <u>↓</u>        | shift             | up                                                 | up     | up      |  |  |
| SACOL0744                           |                     | ABC transporter, ATP-binding protein, MsbA family            | -2                    | T T G T G A A   a a a a   T T <u>↓</u> A C A A        |                   |                                                    |        |         |  |  |
| SACOL0743                           | <i>bacA</i>         | bacitracin resistance protein                                | -234                  | T T G T <u>↓</u> A A   t t t t   T T C A C A A        |                   |                                                    |        |         |  |  |
| SACOL1535                           | <i>srrA</i>         | DNA-binding response regulator SrrA                          | -103                  | T T G <u>↓</u> G A A   t t t t   T T C A C A A        | shift             |                                                    | up     | up      |  |  |
| SACOL2535                           | <i>(ddh)</i>        | D-isomer specific 2-hydroxyacid dehydrogenase family protein | -102                  | T T G T G A <u>↓</u> a t t t   T T C A C A A          | shift             | up                                                 | up     |         |  |  |
| SACOL2534                           | <i>frp</i>          | NAD(P)H-flavin oxidoreductase                                | -185                  | T T G T G A A   a a a t <u>↓</u> T C A C A A          | shift             |                                                    |        |         |  |  |
| SACOL2659                           | <i>aur</i>          | zinc metalloproteinase aureolysin                            | -232                  | T T G T <u>↓</u> A A   t a t t   T T C A C A A        |                   |                                                    |        |         |  |  |
| <b>9 motives with 2 mismatches</b>  |                     |                                                              |                       |                                                       |                   |                                                    |        |         |  |  |
| SACOL0079                           |                     | staphylococcus tandem lipoprotein                            | -101                  | T T G T G A A   a t t t   T T <u>↓</u> A <u>↓</u> A A |                   |                                                    | up     |         |  |  |
| SACOL0204                           | <i>pflB</i>         | formate acetyltransferase                                    | -96                   | <u>↓</u> T G T G A A   a a a a <u>↓</u> T C A C A A   | shift             | up                                                 | up     | up      |  |  |
| SACOL0222                           | <i>ldh1</i>         | L-lactate dehydrogenase                                      | -227                  | <u>↓</u> T G T G A A   a t a a <u>↓</u> T C A C A A   | shift             |                                                    |        | up      |  |  |
| SACOL0220                           | <i>(hmp)</i>        | flavoheomprotein, putative                                   | -363                  | T T G T G A <u>↓</u> t t a t   T T C A C A <u>↓</u>   | shift             |                                                    | up     | up      |  |  |
| SACOL0222                           | <i>ldh1</i>         | L-lactate dehydrogenase                                      | -169                  | <u>↓</u> T G T G A A   a t a a <u>↓</u> T C A C A A   | shift             |                                                    |        | up      |  |  |
| SACOL0747                           |                     | cobalamin synthesis protein/P47K family protein              | -158                  | T T G T <u>↓</u> <u>↓</u> A   t t a a   T T C A C A A |                   |                                                    |        |         |  |  |
| SACOL0746                           | <i>norR</i>         | transcriptional regulator, MarR family                       | -86                   | T T G T G A A   t t a a   T <u>↓</u> <u>↓</u> A C A A |                   |                                                    |        |         |  |  |
| SACOL2007                           |                     | unknown                                                      | -386                  | <u>↓</u> T G T G A A   t a a t <u>↓</u> T C A C A A   |                   |                                                    |        |         |  |  |

Table 1 continued

| Locus <sup>a</sup>                  | Symbol <sup>a</sup> | Description <sup>a</sup>                          | Position <sup>b</sup> | Putative Rex binding sites <sup>c</sup> |                |                                    | EMSA <sup>d</sup>  | Expression under anaerobic conditions <sup>e</sup> |        |         |
|-------------------------------------|---------------------|---------------------------------------------------|-----------------------|-----------------------------------------|----------------|------------------------------------|--------------------|----------------------------------------------------|--------|---------|
|                                     |                     |                                                   |                       |                                         |                |                                    |                    | Gene                                               | Operon | Protein |
| SACOL2006                           | <i>(lukM)</i>       | aerolysin/Leukocidin family protein               | -66                   | T T G T G A <u>↓</u>                    | a t t a        | T T C A C A <u>↓</u>               | shift              | up                                                 | up     |         |
| SACOL2146                           | <i>(mtlF)</i>       | PTS system, mannitol-specific IIBC components     | -208                  | T T G <u>↓</u> <u>↓</u> A A             | t a t t        | T T C A C A A                      |                    | up                                                 | up     |         |
| SACOL2364                           |                     | conserved hypothetical protein                    | -210                  | <u>↓</u> T G T G A <u>↓</u>             | t t t t        | T T C A C A A                      |                    |                                                    |        |         |
| SACOL2363                           | <i>(lctP)</i>       | L-lactate permease                                | -124                  | T T G T G A A                           | a a a a        | <u>↓</u> T C A C A <u>↓</u>        | shift              | up                                                 | up     |         |
| SACOL2492                           |                     | hypothetical protein                              | -323                  | T T G T G A <u>↓</u>                    | <u>↓</u> t a t | T T C A C A A                      |                    |                                                    |        |         |
| SACOL2491                           |                     | conserved hypothetical protein                    | -129                  | T T G T G A A                           | a t a <u>↓</u> | <u>↓</u> T C A C A A               |                    | up                                                 | up     |         |
| <b>36 motives with 3 mismatches</b> |                     |                                                   |                       |                                         |                |                                    |                    |                                                    |        |         |
| SACOL0001                           | <i>dnaA</i>         | chromosomal replication initiator protein DnaA    | -398                  | T T <u>↓</u> T <u>↓</u> A A             | t t a t        | T T C <u>↓</u> C A A               |                    |                                                    |        |         |
| SACOL2740                           | <i>rpmH</i>         | ribosomal protein L34                             | -350                  | T T G <u>↓</u> G A A                    | a t a a        | T T <u>↓</u> A <u>↓</u> A A        |                    |                                                    |        |         |
| SACOL0019                           | <i>yycF (vicR)</i>  | DNA-binding response regulator YycF               | -85                   | <u>↓</u> T G T G A <u>↓</u>             | t t t t        | T <u>↓</u> C A C A A               | shift <sup>f</sup> |                                                    |        |         |
| SACOL0162                           |                     | formate dehydrogenase, NAD-dependent              | -252                  | T T G T <u>↓</u> A A                    | a t t a        | T T <u>↓</u> A C A <u>↓</u>        |                    |                                                    |        | down    |
| SACOL0202                           |                     | sensor histidine kinase family protein            | -184                  | T <u>↓</u> G T G <u>↓</u> A             | a t a t        | T T <u>↓</u> A C A A               |                    |                                                    |        | up      |
| SACOL0235                           |                     | hexitol dehydrogenase                             | -34                   | T T G T G A A                           | t t a a        | <u>↓</u> T C A <u>↓</u> A <u>↓</u> |                    |                                                    |        |         |
| SACOL0319                           |                     | hypothetical protein                              | -137                  | T T G <u>↓</u> <u>↓</u> A <u>↓</u>      | t t a t        | T T C A C A A                      |                    |                                                    |        |         |
| SACOL0526                           |                     | DNA polymerase III, delta prime subunit, putative | -97                   | T T <u>↓</u> T <u>↓</u> A A             | a a t a        | <u>↓</u> T C A C A A               |                    |                                                    |        |         |
| SACOL0552                           |                     | general stress protein 13                         | -69                   | T T G T G A A                           | a a a a        | T <u>↓</u> C A <u>↓</u> A <u>↓</u> |                    |                                                    |        |         |
| SACOLSa5SA                          | <i>5sRNA</i>        | 5S ribosomal RNA                                  | -85                   | <u>↓</u> T G T G A <u>↓</u>             | a a a <u>↓</u> | T T C A C A A                      | no shift           |                                                    |        |         |
| SACOL0601                           |                     | hypothetical protein                              | -72                   | T <u>↓</u> G T G A A                    | a t t a        | <u>↓</u> T C A <u>↓</u> A A        |                    |                                                    |        |         |
| SACOL0602                           |                     | hydrolase, haloacid dehalogenase-like family      | -349                  | T <u>↓</u> G T G A A                    | a t t a        | <u>↓</u> T C A <u>↓</u> A A        |                    |                                                    |        |         |
| SACOL0607                           |                     | azoreductase                                      | -360                  | T T <u>↓</u> <u>↓</u> G A A             | a a a a        | T T <u>↓</u> A C A A               |                    |                                                    |        | down    |
| SACOL0671                           |                     | hydrolase, alpha/beta hydrolase fold family       | -215                  | T <u>↓</u> G T <u>↓</u> A <u>↓</u>      | a t a t        | T T C A C A A                      |                    | up                                                 | up     |         |
| SACOL0944                           |                     | NADH dehydrogenase, putative                      | -242                  | T <u>↓</u> <u>↓</u> T <u>↓</u> A A      | t t t t        | T T C A C A A                      |                    |                                                    |        |         |

Table 1 continued

| Locus <sup>a</sup> | Symbol <sup>a</sup> | Description <sup>a</sup>                                        | Position <sup>b</sup> | Putative Rex binding sites <sup>c</sup>                  | EMSA <sup>d</sup> | Expression under anaerobic conditions <sup>e</sup> |        |         |
|--------------------|---------------------|-----------------------------------------------------------------|-----------------------|----------------------------------------------------------|-------------------|----------------------------------------------------|--------|---------|
|                    |                     |                                                                 |                       |                                                          |                   | Gene                                               | Operon | Protein |
| SACOL0966          | <i>pgi</i>          | glucose-6-phosphate isomerase                                   | -69                   | T T G T G A A t t g a <u>a</u> T C g C A A               | no shift          |                                                    |        |         |
| SACOL0964          | <i>argG</i>         | argininosuccinate synthase                                      | -299                  | T T G <u>c</u> G A <u>t</u> t <u>c</u> a a T T C A C A A |                   |                                                    |        |         |
| SACOL0965          |                     | hypothetical protein                                            | -20                   | T T G <u>c</u> G A <u>t</u> t <u>c</u> a a T T C A C A A |                   |                                                    |        |         |
| SACOL1172          |                     | hypothetical protein                                            | -232                  | T T <u>t</u> T G A A a t t g T T C A <u>a</u> A A        |                   |                                                    |        |         |
| SACOL1188          |                     | hydrolase, haloacid dehalogenase-like family                    | -200                  | <u>g</u> T G T G A A a t t a <u>g</u> <u>g</u> C A C A A |                   |                                                    |        |         |
| SACOL1319          | <i>glpF</i>         | glycerol uptake facilitator protein                             | -157                  | T T G <u>a</u> <u>c</u> A A a a t t T T <u>t</u> A C A A |                   |                                                    |        |         |
| SACOL1318          |                     | hypothetical protein                                            | -143                  | T T G T <u>a</u> A A a a t t T T <u>g</u> <u>t</u> C A A |                   |                                                    |        |         |
| SACOL1404          | <i>trpG</i>         | anthranilate synthase, glutamine amidotransferase, component II | -283                  | T T G <u>c</u> G A A t t t a T T <u>a</u> <u>c</u> C A A |                   |                                                    |        |         |
| SACOL1429          | <i>asd</i>          | aspartate-semialdehyde dehydrogenase                            | -52                   | T T G T <u>t</u> A A a a t a T T C <u>t</u> <u>a</u> A A |                   |                                                    |        |         |
| SACOL1562          |                     | 2-oxoisovalerate dehydrogenase, E1 component, alpha subunit     | -378                  | <u>a</u> <u>a</u> G T G <u>t</u> A t t t a T T C A C A A |                   |                                                    |        |         |
| SACOL1610          | <i>sodA2</i>        | superoxide dismutase                                            | -339                  | T <u>g</u> G T G <u>t</u> <u>t</u> a a t a T T C A C A A |                   | down                                               | down   | down    |
| SACOL1831          | <i>tal</i>          | transaldolase                                                   | -39                   | T T G T <u>t</u> A A a a t t T T <u>a</u> A <u>t</u> A A |                   |                                                    |        |         |
| SACOL1848          |                     | hypothetical protein                                            | -127                  | T <u>a</u> G <u>c</u> <u>c</u> A A a a t a T T C A C A A |                   |                                                    | up     |         |
| SACOL2070          | <i>kdpD</i>         | sensor protein                                                  | -250                  | T T <u>c</u> T <u>a</u> A A a t t t T T C A C <u>t</u> A |                   |                                                    |        |         |
| SACOL2068          | <i>kdpA</i>         | Potassium-transporting ATPase A chain                           | -39                   | T <u>a</u> G T G A A a a a t T T <u>t</u> A <u>g</u> A A |                   |                                                    |        |         |
| SACOL2106          |                     | UPF0340 protein SACOL2106                                       | -2                    | T T <u>a</u> T G A A a <u>g</u> a t T T <u>g</u> A C A A |                   |                                                    |        |         |
| SACOL2112          | <i>rpmE2</i>        | 50S ribosomal protein L31 type B                                | -61                   | T T G <u>g</u> G <u>t</u> A a a a a <u>c</u> T C A C A A |                   |                                                    |        |         |
| SACOL2171          |                     | aerobactin biosynthesis protein, IucA/IucC family               | -27                   | T T G T <u>a</u> A A a t a t T T C A <u>t</u> A <u>g</u> |                   |                                                    |        |         |
| SACOL2170          |                     | transporter, putative                                           | -92                   | <u>c</u> T <u>a</u> T G A A a t a t T T <u>t</u> A C A A |                   |                                                    |        |         |
| SACOL2190          |                     | putative, uncharacterised protein                               | -191                  | T <u>g</u> G T G A A t t t a <u>c</u> T C A <u>a</u> A A |                   |                                                    |        |         |
| SACOL2399          | <i>nirR</i>         | transcriptional regulator NirR                                  | -64                   | <u>a</u> T G T G A <u>t</u> t <u>c</u> t t T T C A C A A | shift             | up                                                 | up     |         |
| SACOL2409          | <i>fmhA</i>         | FmhA protein                                                    | -51                   | T T <u>a</u> T <u>t</u> A A t a a a T T C A <u>a</u> A A |                   |                                                    |        |         |

Table 1 continued

| Locus <sup>a</sup> | Symbol <sup>a</sup> | Description <sup>a</sup>          | Position <sup>b</sup> | Putative Rex binding sites <sup>c</sup> |         |                             | EMSA <sup>d</sup> | Expression under anaerobic conditions <sup>e</sup> |        |         |
|--------------------|---------------------|-----------------------------------|-----------------------|-----------------------------------------|---------|-----------------------------|-------------------|----------------------------------------------------|--------|---------|
|                    |                     |                                   |                       |                                         |         |                             |                   | Gene                                               | Operon | Protein |
| SACOL2408          |                     | lipoprotein, putative             | -212                  | T T <u>t</u> T G A A                    | t t t a | T T <u>a</u> A <u>t</u> A A |                   |                                                    |        |         |
| SACOL2429          |                     | putative, uncharacterised protein | -193                  | <u>a</u> <u>g</u> G T G A A             | a t a a | T T C A <u>a</u> A A        |                   |                                                    |        |         |
| SACOL2603          |                     | putative, uncharacterised protein | -109                  | T T <u>t</u> T G A A                    | t a t a | <u>a</u> T C A <u>t</u> A A |                   |                                                    |        |         |
| SACOL2642          |                     | putative, uncharacterised protein | -161                  | <u>g</u> T <u>t</u> T G A A             | a a t t | <u>g</u> T C A C A A        |                   |                                                    |        |         |
| SACOL2657          | <i>arcA</i>         | arginine deiminase                | -79                   | <u>a</u> T G T G A A                    | t a t a | <u>a</u> T C A C A <u>t</u> | shift             | up                                                 | up     |         |

<sup>a</sup> A genome-wide search for potential Rex binding sites was done with the motif TTGTGAA W<sub>4</sub> TTCACAA against the *S. aureus* COL genome sequence. A total of 55 different motives with up to 3 mismatches up to 400 base pairs in front of the genes are shown. Locus, symbol and description of the corresponding gene are based on TIGR annotation (<http://www.tigr.org>). Gene symbols in brackets refer to common annotations in other *S. aureus* strains.

<sup>b</sup> The position of the potential Rex binding site is related to the translational start.

<sup>c</sup> Matches to the Rex consensus sequence are shown in capital letters. Mismatches to the Rex consensus sequence are underlined and shown in bold.

<sup>d</sup> Rex binding sites that have been verified by EMSA in the present study are indicated by “shift”. Motives showing no Rex binding affinity are indicated by “no shift”.

<sup>e</sup> Based on transcriptome and proteome data published by Fuchs *et al.* (2007).

<sup>f</sup> In EMSA, Rex bound to the regulatory region of *vicR* only in the presence of NAD<sup>+</sup> (Fig. 3).

**Tab. S2** Synthetic oligonucleotides used in this study

| Name                                                                  | Sequence (5'-3')                                        |
|-----------------------------------------------------------------------|---------------------------------------------------------|
| primers used for cloning of <i>rex</i> into pPR-IBA1                  |                                                         |
| Sa_rex_for                                                            | ATGGTAGGTCTCAAATGAGTGACCAAGTTAAAATTCCTCGAG              |
| Sa_rex_rev                                                            | ATGGTAGGTCTCAGCGCTTTCACCTGTAATTTTTCATAAAGAATAATA        |
| primers used for Rex-DNA binding studies                              |                                                         |
| SACOL0019_for                                                         | ATAAGACGGAAAATGCGCAC                                    |
| SACOL0019_rev                                                         | CTTCCATACCATCACGACCA                                    |
| SACOL0301_for                                                         | ACTTAATAAATGCTCACTGCC                                   |
| SACOL0301_rev                                                         | CCTCACAATGACTCCTCGC                                     |
| SACOL0660_for                                                         | GACACATTTTTTTGATCATAGC                                  |
| SACOL0660_rev                                                         | GCTCTCATAATAATGTCCTCC                                   |
| SACOL1778_for                                                         | ATACAACATAAATCAAATGGAG                                  |
| SACOL1778_rev                                                         | AACTAACATTTGCAACACTCC                                   |
| SACOL1535_for                                                         | AAATGTTGTCGGTTTGAATGC                                   |
| SACOL1535_rev                                                         | TTCGACATACAGGTCATACC                                    |
| SACOL2006_for                                                         | AAGATGCAGGATATTATTTAGC                                  |
| SACOL2006_rev                                                         | GCACATGATAATGATGACGC                                    |
| SACOL2035_for                                                         | CATTCGATCTTCACCTTTCG                                    |
| SACOL2035_rev                                                         | GTCACTCATTGCTATTTCC                                     |
| SACOL2363_for                                                         | GTACAATTCATTTTGATGAACAG                                 |
| SACOL2363_rev                                                         | AAACGTATTTACTAACATAGGC                                  |
| SACOL1889_for                                                         | GAAAATTGGAATAGTTGATGGG                                  |
| SACOL1889_rev                                                         | GTTTTTATTATGCACCATAAAGG                                 |
| SACOL2399_for                                                         | ATATACTACAAGCGACCG                                      |
| SACOL2399_rev                                                         | CCATTCACATTTACCAACCC                                    |
| SACOL2535_for                                                         | TATTGCTCATTGAACATAGCC                                   |
| SACOL2535_rev                                                         | TTGTCATTATTA AAAACCTCGC                                 |
| SACOL2563_for                                                         | ATATTGAAAATGCAATGGATCC                                  |
| SACOL2563_rev                                                         | CCGTTATTCATATAACATCACC                                  |
| SACOL2657_for                                                         | TATACAACGTGTTTTTTGTGGG                                  |
| SACOL2657_rev                                                         | CGCTATTTACTTTAATTGGACC                                  |
| SACOL_Sa5SA_for                                                       | AAAATTGTATAGAATGTGTATGG                                 |
| SACOL_Sa5SA_rev                                                       | ATAGCCACCAGACAAAATAAC                                   |
| Sa_ldh1_for                                                           | TAAAATGTGAAATAAATCACAATTTAAT                            |
| Sa_ldh2_for                                                           | TTATATGTGAAATAAATCACAAACTTAA                            |
| Sa_adhE_for                                                           | ATATGAAACACTTAATAAAGTGTGGTA                             |
| Sa_nirC_for                                                           | AATTTTGTGAAATTATTCACAAATAAGA                            |
| Sa_adh1_for                                                           | TATAATGTGAATTAATTCACAAAGTATA                            |
| primers used for protein-DNA interaction studies and primer extension |                                                         |
| SACOL0135_for                                                         | GCGATATAACAAGCTTTTTAGG                                  |
| SACOL0135_rev                                                         | TCTTGTTCTTTCGATCCACG                                    |
| SACOL0204_for                                                         | GTGTAACAGAATGCAATTAGC                                   |
| SACOL0204_rev                                                         | TCTTCCATTTTTAAATCCTTGCC                                 |
| SACOL0222_for                                                         | ATCGTATACAAATTA AAAAGGTG                                |
| SACOL0222_rev                                                         | TTTGTTCAATACAAAACTCCC                                   |
| primers used for cloning the <i>adhE</i> upstream region              |                                                         |
| SACOL0135_for2                                                        | CATTTTTGAATCATCTAGCAGG                                  |
| SACOL0135_rev2                                                        | ATATGTTGATCAACAGCTGC                                    |
| primers used for RNA-probe synthesis                                  |                                                         |
| <i>rex</i> _for                                                       | TGAGTGACCAAGTTAAAATTCC                                  |
| <i>rex</i> _rev <sup>1</sup>                                          | <u>CTAATACGACTCACTATAGGGAGATAATAATGACTGTAATTCTATACC</u> |
| <i>ldh1</i> _for                                                      | CATGCCACACCATATTCTCC                                    |

|                              |                                                       |
|------------------------------|-------------------------------------------------------|
| <i>ldhI_rev</i> <sup>1</sup> | <u>CTAATACGACTCACTATAGGGAGAGCTGATACAGTCAATACGGC</u>   |
| <i>lctP_for</i>              | GCAGAATGTGCTTTTGCAGG                                  |
| <i>lctP_rev</i> <sup>1</sup> | <u>CTAATACGACTCACTATAGGGAGAGCAGAATGTGCTTTTGCAGG</u>   |
| <i>srrA_for</i>              | CCATGAAGCAAGTAATGGCC                                  |
| <i>lctP_rev</i> <sup>1</sup> | <u>CTAATACGACTCACTATAGGGAGATCAAATTTATACCCAACGCCC</u>  |
| <i>adhI_for</i>              | GTCTATCGCTTGGATGTTCCG                                 |
| <i>adhI_rev</i> <sup>1</sup> | <u>TAATACGACTCACTATAGGGAGACCGTCAAGCACTAATCTTGG</u>    |
| <i>adhE_for</i>              | ATGCTCTAGCTGACAAAGGG                                  |
| <i>adhE_rev</i> <sup>1</sup> | <u>CTAATACGACTCACTATAGGGATGTGCACTTGGATGGAATGC</u>     |
| <i>aldI_for</i>              | TTGCACACCCGAAAATGTGC                                  |
| <i>aldI_rev</i> <sup>1</sup> | <u>CTAATACGACTCACTATAGGGAGATGCGGTCATCGTTTAACTCG</u>   |
| <i>pflB_for</i>              | GGTGCAGCAATGAGTTTAGG                                  |
| <i>pflB_rev</i> <sup>1</sup> | <u>CTAATACGACTCACTATAGGGAGATTTGGACCAACTTGTGCACC</u>   |
| <i>nirR_for</i>              | TTGTTGCACATGGCATGAGG                                  |
| <i>nirR_rev</i> <sup>1</sup> | <u>CTAATACGACTCACTATAGGGAGAACCATGTCATTCAATTTGCTGC</u> |
| <i>narH_for</i>              | TACCACGTTTATGTGAACATTGC                               |
| <i>narH_rev</i> <sup>1</sup> | <u>CTAATACGACTCACTATAGGGAGATCGGCATCGTTCTAAATTCAGG</u> |
| <i>clpL_for</i>              | AAAAATAACACACAATATTC                                  |
| <i>clpL_rev</i> <sup>1</sup> | <u>CTAATACGACTCACTATAGGGAGACTCAACCGATAATTTGATGG</u>   |
| <i>vicR_for</i>              | GTGTA CTGTGCATACGATGG                                 |
| <i>vicR_rev</i> <sup>1</sup> | <u>CTAATACGACTCACTATAGGGAGAAATATCCAACGCCTCTACGC</u>   |

---

<sup>1</sup> underlined sequence corresponds to the T7 polymerase binding site (Jorgensen et al., 1991)

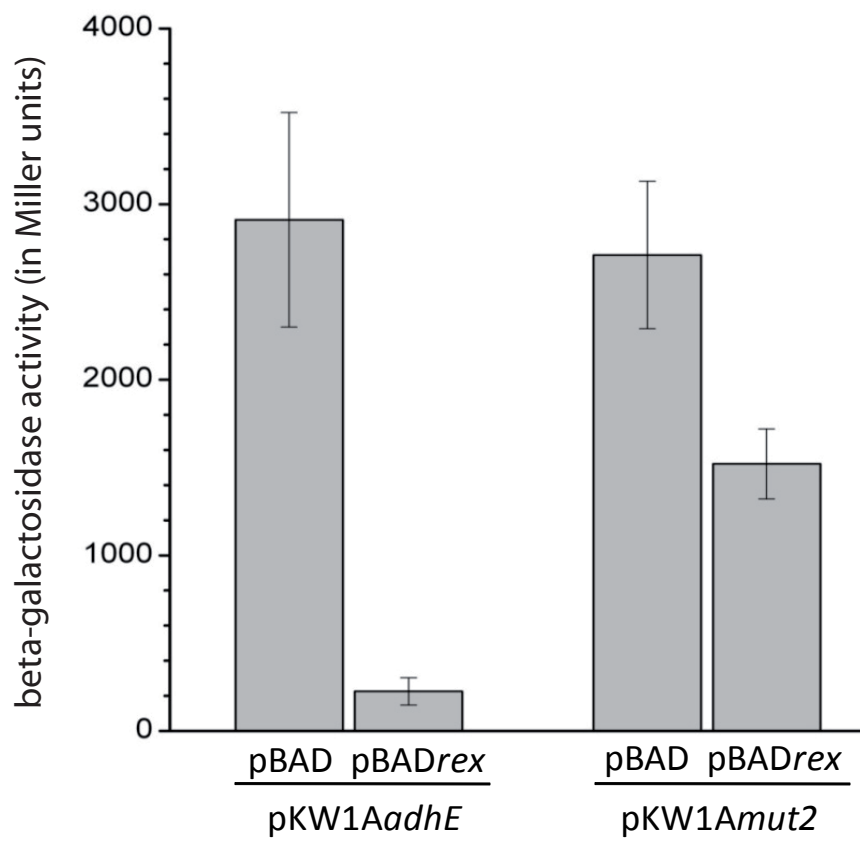

Figure S1

## Legend to Fig. 1S

### Characterisation of the *in vivo* effect of Rex binding to the *adhE* upstream region by $\beta$ -galactosidase assays

*Escherichia coli* DH5 $\alpha$  was transformed with plasmid pKW1A*adhE* (transcriptional fusion of the *adhE* upstream region of *S. aureus* to the *lacZYA* operon of *E. coli*) or pKW1A*mut2* (transcriptional fusion of the *adhE* upstream region of *S. aureus* with the mutated Rex binding site (mutant 2) to the *lacZYA* operon of *E. coli*). In a second step, verified clones were either transformed with plasmid pBAD*rex* (carrying the *rex* gene of *S. aureus* COL) or pBAD (Guzman *et al.*, 1995) as a control.  $\beta$ -galactosidase activity is shown as average value of Miller units of three biological replicates with the respective standard deviation.

Briefly, overnight cultures were grown at 37°C and 160 rpm in LB medium, 1:20 diluted in fresh medium containing 2% arabinose and incubated for 2 h under mentioned conditions. The cultures were then collected by centrifugation at 4°C and washed in cold 0.85% (w/v) NaCl before enzyme activity assays were performed.  $\beta$ -galactosidase enzyme activities are expressed in arbitrary units, which were determined according to the formula of Miller *et al.* (1972). Cultures were assayed in triplicate and reported values are averaged from at least four different experiments. Bacteria carrying the reporter plasmid containing the *adhE* promoter but empty expression plasmids served as controls.

### References

- Guzman L.M., Belin D., Carson M.J., and Beckwith J. (1995) Tight regulation, modulation, and high-level expression by vectors containing the arabinose PBAD promoter. *J Bacteriol* **177**: 4121-4130.
- Miller J.H. (1972) Experiments in molecular genetics. Cold Spring Harbor Laboratory Press, Cold Spring Harbor, NY



*rex*

+ O<sub>2</sub>      - O<sub>2</sub>  
w r a      w r a

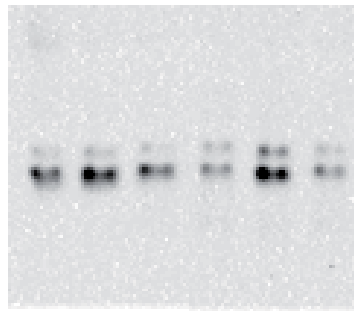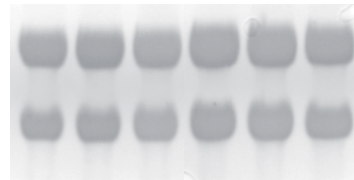

**A**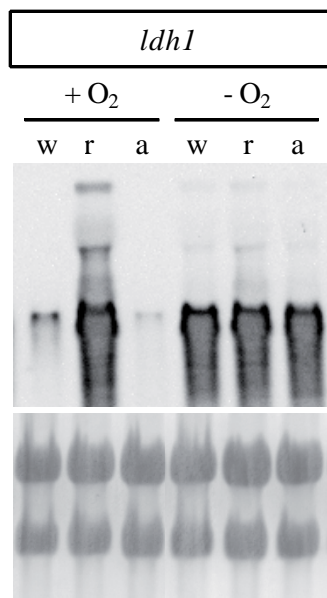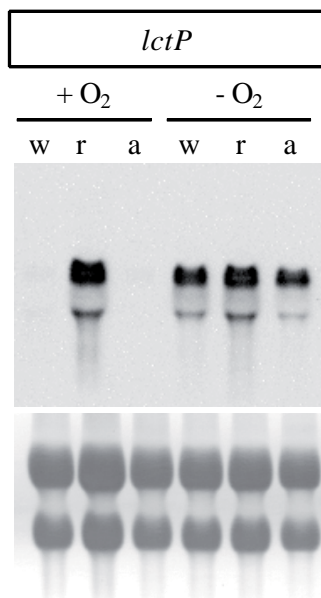**B**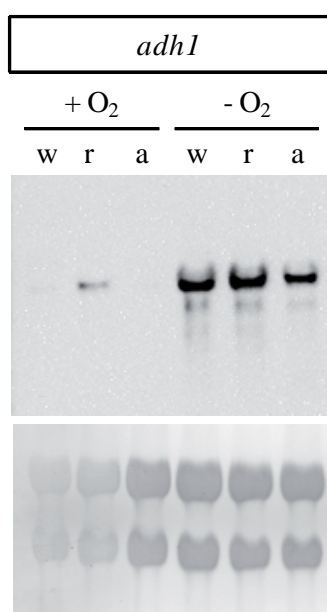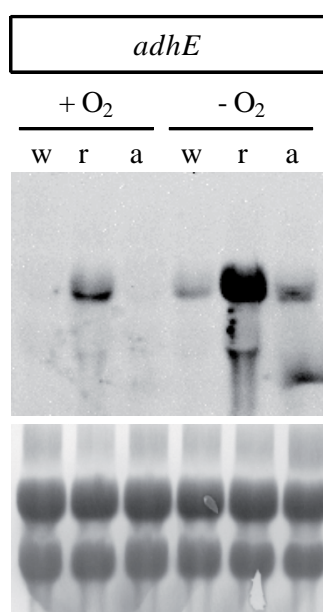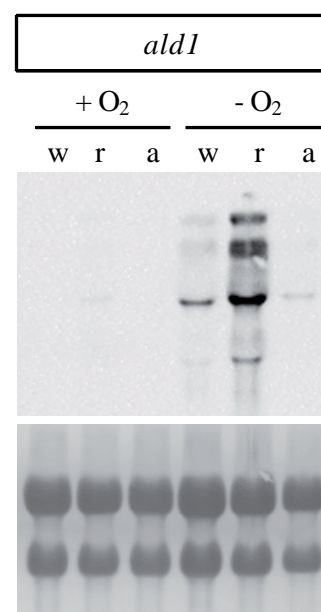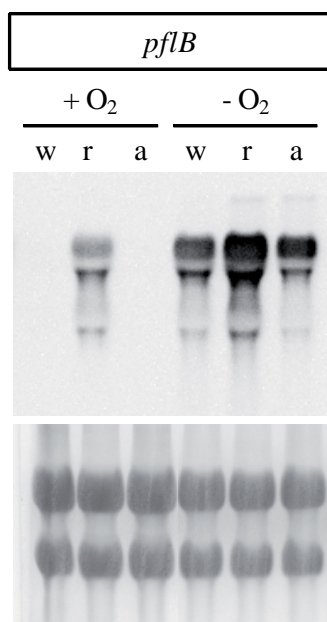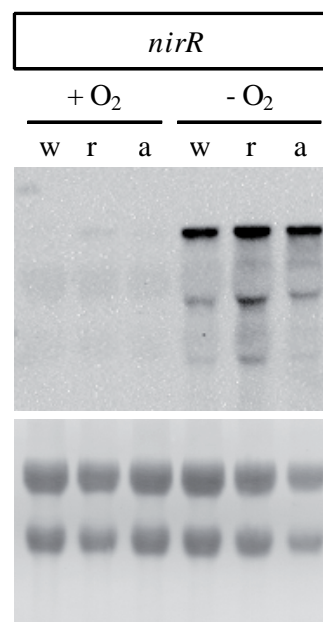

C

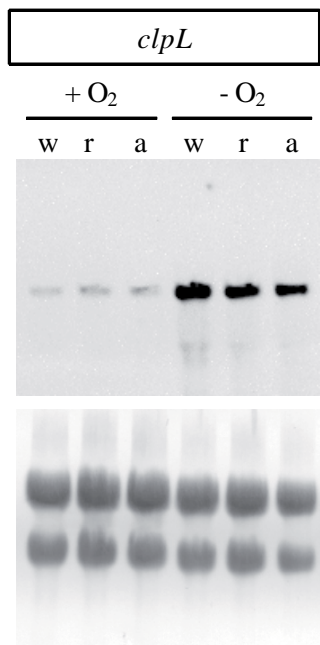

Figure S3
